# Supplementary material for: Co-infecting Reptarenaviruses Can Be Vertically Transmitted in Boa Constrictor
Source: PLoS Pathog. 2017 Jan 23;13(1):e1006179. doi: 10.1371/journal.ppat.1006179 (PMC5289648; doi:10.1371/journal.ppat.1006179)
Supplement: S1 Table — (XLSX) [file ppat.1006179.s001.xlsx]

## Sheet: Sheet1
L segment primers
Virus(es)	Abbreviations	GenBank accession Nos.	Forward	Reverse
University of Helsinki virus-4	UHV-4	KR870027(DB), KX527590	CATTCTTTCAGGATCAAAATAATC	GAAAGTAAAATTGAGCCTCCAG
University of Helsinki virus-1	UHV-1	KR870020	- - - - " - - - - -	CTGGAGGCTCAATTTTACTTTCTTC
Aurora borealis virus-1	ABV-1	KR870021	CAACCTGCTTGGTTCATAATAG	GAAAATGAGCTGAGTAAACAAGC
University of Giessen virus-1	UGV-1	KR870022	CTAATCTCTCAGGATTGTAGTAGTCC	CATGAATCTACCCTTGACAAAAG
University of Giessen virus-3	UGV-3	KR870023	CTTTCTTTTCATTTAATATAAACCCC	GTAGGATGGAAAGTGTATCCATG
Suri Vanera virus-1	SVaV-1	KR870024, KX527585	CTTTTAGGGTTGTAGTAATCAACTAAA	CATGACTCAGAGTTAGAGAAAGG
Aurora borealis virus-3	ABV-3	KR870025(DB), KX527583	CAACCCATTTGGTTCATAATAATC	GAAGGTGGATTAGGTAAGCAG
Tavallinen suomalainen mies virus-1 & -2	TSMV-1 & -2	KR870026(TSMV-1),KX527595, KX527582, KX527591	CTTTGCGGGTCATAATAATC	CTGAATCAGAAATTGGGAAAC
Hans Kompis virus-1	HKV-1	KR870028;	CCTCTCGGGACTGTAATAGTC	CTCAGAAACGGAGTTAGGAAG
University of Giessen virus-2	UGV-2	KR870029;	CAATCTCTCAGGACTGTAGTAGTCTAC	CAACTCCACTCCTGACAAAAG
Haartman Institute snake virus-1	HISV-1	KR870031	GTTTAATGGTACTGGTTTTACAAATG	GAAGTGGTTGAGCCCAG
University of Helsinki virus-2	UHV-2	KR870030	CATCCTTTCAGGATCAAAATAATC	GAAAGTGGGGTTGAAGTTC
University of Helsinki virus-3	UHV-3	KR870032(UHV-3),KX527586	CCTGCTTGGTTCATAATAATCC	GAATGAGTTGGGTAGGCAAG
Boa NL AV3	Boa NL AV3	NC_023762	CAACCTACTTGGATCATAATAGTCTAC	GCTTGTTTACTCAACTCATCTTCAAC
Golden Gate virus	GGV	KP071475	CAATCTACCTGGTTCATAATAGTCCAC	CATCTGCTTATCCATTTCACTTTCAAC
CAS virus	CASV	NC_018484	CTAGGTGTTCTAATTTAAAATACTCAG	GGAATTTGTTCAACTGTCTGTCCTC
Aurora borealis virus-4	ABV-4	KX527594, KX527592	CAATCTGCTTGGTTCATAATAATC	CTGTGGAGTTGAGGGTGAAT
Hans Kompis virus like	HKV-like	KX527596	CCTTCTTTTGCACATTCAAT	GTGGCTCAGAAACGGA
Suri Vanera virus-2	SVaV-2 / L12-like	KX527599, KX527587	CTTTTAGGGTTGTAGTAATCAACTAAA	CAGTCTGCGCTGTTGGA
Keijut pohjoismaissa virus-1	KePV-1 / L15-like	KX527597, KX527589	GTCGTTGAGACCTAGAAGG	CTGTACTTACAAAACCAGTCAA
Bis spöter virus-1	BSV-1 / L18-like	KX527598	GGACGAACCTTCCAAGAA	CAGAAAAGGTGATGGAACC
Grüetzi mitenant virus-1	GMV-1 / L19-like	KX527593	GCACAATGGGCTTCAAGT	AAAGGTGATGGAACATTTCTG
Kuka mitä häh virus-1	KMHV-1 / L22-like	KX527588	TCGTCTGATCCCAGATGT	GCTTTTGATGAGACACTCCT
Kaltenbach virus-1	KaBV-1	KX527584	GACAACTGCCTCCTCTGA	GCAATCAGTGTGTGCAGTAG
S segment primers
Virus(es)			Forward	Reverse
University of Helsinki virus-1	UHV-1	KR870011	TTTGTCGTCTGCCTTCAC	GCTTTGTTGACTATACAGAAGG
Aurora borealis virus-1	ABV-1	KR870010	TCAAGTCCGGGTATAACCTAG	GAATTCAAGATAAAGATTGTCATAGATG
University of Giessen virus-1 & -4	UGV-1 & -4	KR870012, KR870014, KX527577	ATAAGGTCAGGGTATAACTTGG	GAACTTGGCATAAAAATACAAATAAATG
University of Giessen virus-2 & -3	UGV-2 & -3 / S6-like	KR870015, KR870013, KX527578, KX527580	- - - - " - - - - -	GAACTTGGCATAAAAATACAAATGAATG
University of Helsinki virus-2	UHV-2	KR870016	ATCAAGTCAGGATAAAGCCTAG	GAGTTCGGAATAAAGATTGTTGTTG
University of Helsinki virus-3	UHV-3	KR870019	- - - - " - - - - -	GAGTTCGGAATAAAGATTGTCGTT
Haartman Institute snake virus-1	HISV-1	KR870017	ATTTCTCTTGACATTTGTTCTGTTTC	CTAGATTTCAATCATCAATAAGTGC
Aurora borealis virus-2	ABV-2	KR870018, KX527576	CAAGTCAGGGTACAACTTCG	GAACTTAACATCAAAATACAAGTGAATG
S5-like virus	S5-like	KX527579, KX527581	GTCAGGATAGAGTCTGGGAGCAT	TGAACATTCAGAGGGAATTTGGCATC
Tavallinen suomalainen mies virus-2	TSMV-2	KX527575	CAAGTCTGGATAAAGTCTTGGTGCAT	GTAATTGATGACGACAATAGGGTCGA
